# Supplementary material
Source: PubMed Central journal article supplement (PMC8967619)

## Supplemental Materials Table of Contents

| Section                                                                                                                         | Page |
|---------------------------------------------------------------------------------------------------------------------------------|------|
| <b>Supplemental Figure 1.</b> Heterogeneity of cells captured from each patient sample.                                         | 2    |
| <b>Supplemental Figure 2.</b> Gene Set Enrichment Analysis (GSEA) of hallmark pathways in both AKI and no AKI control clusters. | 3    |
| <b>Supplemental Figure 3.</b> Heatmap of differentially expressed genes from Patient 7 cell clusters.                           | 4    |

### Supplemental Figure 1. Heterogeneity of cells captured from each patient sample. A)

Number of cells sequenced from each patient with COVID-19 AKI (red), without AKI (black), or with non-COVID-19 AKI (blue). B) Breakdown of various patient cell contributions to integrated UMAP.

C) Breakdown of COVID-19 AKI (red) and no AKI control (blue), and non-COVID-19 AKI (green) contribution to integrated UMAP.

Supplemental Figure 1

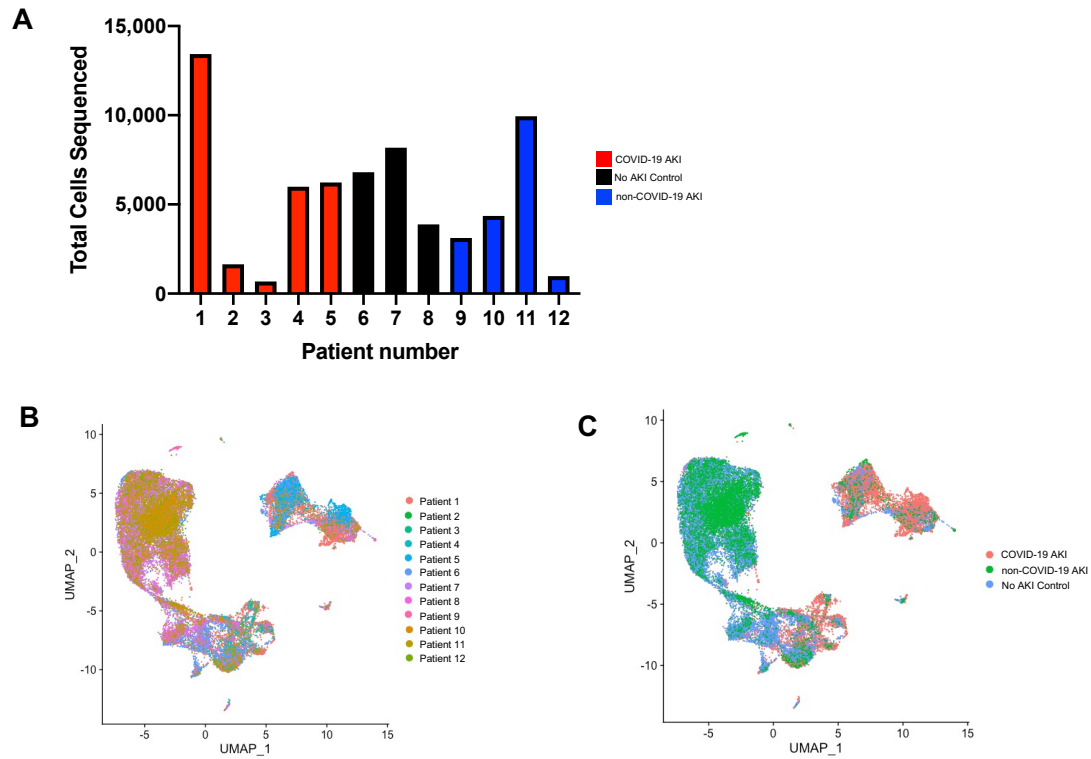

**Supplemental Figure 2. Gene Set Enrichment Analysis (GSEA) of hallmark pathways in both AKI and no AKI control clusters.** A) Up and downregulation of various hallmark pathways in COVID-19 AKI (orange), no AKI control (green), and non-COVID-19 AKI (blue) clusters. B) Up and downregulation of interferon alpha response pathways in each individual cell type in COVID-19 AKI (blue), no AKI control (turquoise), and non-COVID-19 AKI (red).

Supplemental Figure 2

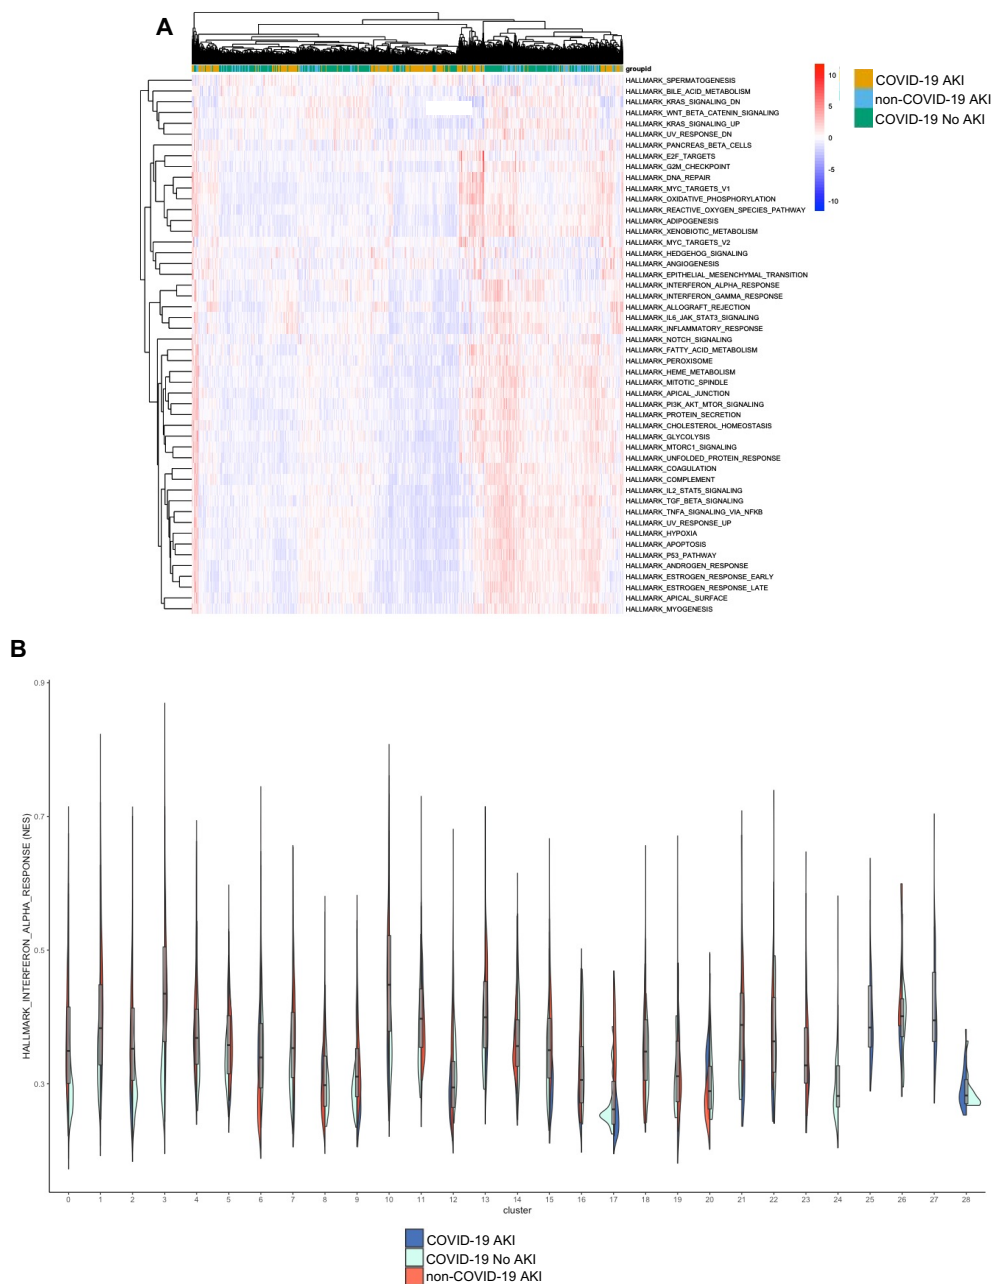

### Supplemental Figure 3. Heatmap of differentially expressed genes from Patient 7 cell clusters.

Supplemental Figure 3

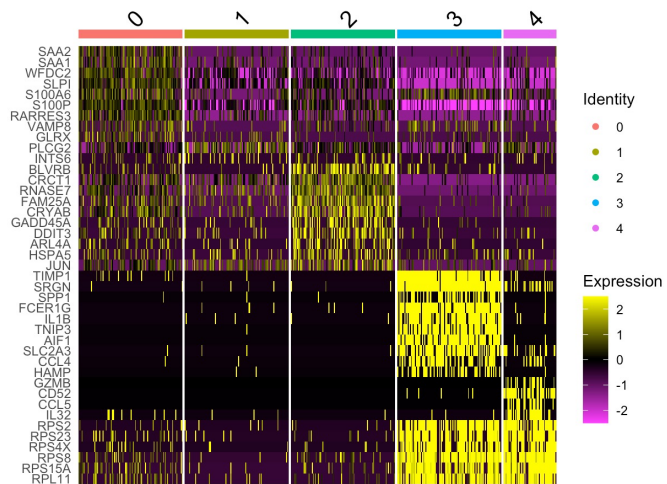

Supplement: 7789_2_supp_95586_r1yrmq.pdf [file 7789_2_supp_95586_r1yrmq.pdf]
